# Supplementary material
Source: MDPI journal article supplement (https://www.mdpi.com/2311-5637/9/8/730)
Supplement: s1 [file s1]

# Supplementary material

**Table S1.** Cleaning of the dataset (number of reads) of the metabarcoding of 16S rRNA of ruminal fluid of high-producing lactating dairy cows (n=64).

| Sample ID | input  | filtered | denoisedF | nonchim | Coverage |
|-----------|--------|----------|-----------|---------|----------|
| 101       | 170205 | 94781    | 89929     | 84520   | 0.993265 |
| 102       | 166264 | 95724    | 91242     | 82939   | 0.993605 |
| 103       | 116868 | 62580    | 58610     | 55000   | 0.994762 |
| 104       | 163353 | 92456    | 87850     | 78031   | 0.994422 |
| 105       | 88338  | 48491    | 45564     | 41900   | 0.996327 |
| 106       | 89177  | 49590    | 46331     | 44482   | 0.99619  |
| 107       | 76846  | 43318    | 40810     | 38535   | 0.996871 |
| 108       | 103114 | 57607    | 53869     | 48698   | 0.99585  |
| 109       | 121048 | 72337    | 68624     | 63454   | 0.994898 |
| 110       | 166970 | 94519    | 90125     | 82415   | 0.994898 |
| 111       | 160318 | 93023    | 87608     | 82503   | 0.993265 |
| 112       | 184135 | 107527   | 102787    | 95036   | 0.994082 |
| 113       | 94601  | 53990    | 50755     | 47571   | 0.99517  |
| 114       | 194487 | 113033   | 107718    | 101427  | 0.991837 |
| 115       | 146675 | 84987    | 80977     | 74116   | 0.995102 |
| 116       | 226585 | 129744   | 123761    | 112656  | 0.991088 |
| 117       | 36763  | 19788    | 17671     | 16532   | 0.999728 |
| 118       | 90635  | 49743    | 46179     | 44201   | 0.995034 |
| 119       | 83505  | 48105    | 44666     | 43251   | 0.995986 |
| 120       | 91879  | 52277    | 49374     | 45065   | 0.995578 |
| 121       | 74272  | 42290    | 38857     | 37709   | 0.99483  |
| 122       | 110793 | 61937    | 58523     | 54937   | 0.99415  |
| 123       | 89500  | 49626    | 46049     | 44162   | 0.994558 |
| 124       | 100688 | 56425    | 52485     | 50448   | 0.993333 |
| 125       | 102792 | 60052    | 56639     | 52635   | 0.994694 |
| 126       | 196557 | 107468   | 101643    | 95157   | 0.993673 |
| 127       | 138804 | 78831    | 73753     | 68419   | 0.99415  |

|     |        |       |       |       |          |
|-----|--------|-------|-------|-------|----------|
| 128 | 164490 | 88045 | 82849 | 74340 | 0.993605 |
| 129 | 56425  | 31673 | 28644 | 27551 | 0.994762 |
| 130 | 50997  | 27988 | 24823 | 23824 | 0.996871 |
| 131 | 50960  | 30284 | 27698 | 26759 | 0.996803 |
| 132 | 53787  | 32554 | 29815 | 28455 | 0.996531 |
| 133 | 102755 | 58399 | 53144 | 50802 | 0.993946 |
| 134 | 98497  | 56561 | 51601 | 49123 | 0.993946 |
| 135 | 100602 | 56950 | 51590 | 50269 | 0.994354 |
| 136 | 123214 | 68850 | 63292 | 60844 | 0.994082 |
| 137 | 111123 | 61459 | 57178 | 53642 | 0.99483  |
| 138 | 94011  | 53081 | 48418 | 46202 | 0.992993 |
| 139 | 98917  | 56329 | 51123 | 48600 | 0.992721 |
| 140 | 93298  | 53084 | 48408 | 45822 | 0.995306 |
| 141 | 29543  | 16722 | 15148 | 14717 | 1        |
| 142 | 52090  | 30242 | 26672 | 26269 | 0.997211 |
| 143 | 88202  | 49101 | 44633 | 43534 | 0.995782 |
| 144 | 131897 | 74299 | 68204 | 64274 | 0.993197 |
| 145 | 111601 | 64232 | 58793 | 56802 | 0.994082 |
| 146 | 126115 | 72089 | 66334 | 64032 | 0.991837 |
| 147 | 120751 | 70236 | 64661 | 61127 | 0.992313 |
| 148 | 105353 | 60817 | 55541 | 53261 | 0.993061 |
| 149 | 102758 | 58560 | 53281 | 51008 | 0.994694 |
| 150 | 141180 | 79390 | 72727 | 67768 | 0.991973 |
| 151 | 102988 | 58878 | 52888 | 49563 | 0.993605 |
| 152 | 132316 | 74108 | 68716 | 63620 | 0.992245 |
| 153 | 77726  | 43710 | 39352 | 37669 | 0.995986 |
| 154 | 121031 | 67152 | 61410 | 58557 | 0.992925 |
| 155 | 116267 | 66851 | 61100 | 57575 | 0.993197 |
| 156 | 101922 | 58847 | 53655 | 50826 | 0.994218 |
| 157 | 130586 | 76084 | 69974 | 66841 | 0.991088 |
| 158 | 129472 | 75637 | 69657 | 65804 | 0.991905 |

|     |        |       |       |       |          |
|-----|--------|-------|-------|-------|----------|
| 159 | 106333 | 62340 | 56318 | 53627 | 0.993333 |
| 160 | 122261 | 68233 | 62201 | 58782 | 0.992993 |
| 161 | 135917 | 78448 | 71752 | 68186 | 0.993061 |
| 162 | 80862  | 45468 | 40151 | 37902 | 0.994898 |
| 163 | 128494 | 76865 | 70224 | 64986 | 0.992381 |
| 164 | 72475  | 43797 | 39832 | 38216 | 0.993129 |

**Table S2.** Output from *Aldex2* package, where relative differential abundance at genus level between liquid-associated microenvironment (LAM) and solid-associated microenvironment (SAM) samples was evaluated.

| Phylum         | Class           | Order                          | Family                 | Genus                         | LAB   | PAB  | effect | overlap |
|----------------|-----------------|--------------------------------|------------------------|-------------------------------|-------|------|--------|---------|
| Bacteroidota   | Bacteroidia     | Bacteroidales                  | Prevotellaceae         | Prevotellaceae Ga6A1 group    | 3.46  | 5.68 | 1.41   | 0.06    |
| Euryarchaeota  | Methanobacteria | Methanobacteriales             | Methanobacteriaceae    | Methanosphaera                | 0.92  | 2.25 | 1.47   | 0.05    |
| Fibrobacterota | Fibrobacteria   | Fibrobacterales                | Fibrobacteraceae       | Fibrobacter                   | 0.72  | 3.55 | 1.55   | 0.04    |
|                |                 |                                |                        | Butyrivibrio                  | 4.56  | 6.76 | 2.58   | 0.0005  |
|                |                 |                                |                        | Lachnospiraceae XPB1014 group | 1.69  | 3.90 | 2.19   | 0.004   |
|                |                 |                                |                        | Oribacterium                  | 1.40  | 3.57 | 1.75   | 0.03    |
|                |                 |                                |                        | probable genus 10             | 1.99  | 4.18 | 1.34   | 0.04    |
|                |                 |                                |                        | Catonella                     | -7.07 | 0.87 | 1.29   | 0.12    |
| Firmicutes     | Clostridia      | Lachnospirales                 | Lachnospiraceae        | Lachnospiraceae AC2044 group  | 1.36  | 3.66 | 1.17   | 0.07    |
|                |                 |                                |                        | Acetitomaculum                | 4.03  | 5.30 | 1.09   | 0.11    |
|                |                 |                                |                        | Lachnospiraceae NK3A20 group  | 5.10  | 5.97 | 1.08   | 0.12    |
|                |                 | NA                             | Hungateiclostridiaceae | Saccharofermentans            | 3.60  | 5.57 | 1.89   | 0.01    |
|                | Negativicutes   | Veillonellales-Selenomonadales | Selenomonadaceae       | Anaerovibrio                  | 2.18  | 3.75 | 1.15   | 0.09    |
| Spirochaetota  | Spirochaetia    | Spirochaetales                 | Spirochaetaceae        | Treponema                     | 3.81  | 5.21 | 1.17   | 0.10    |

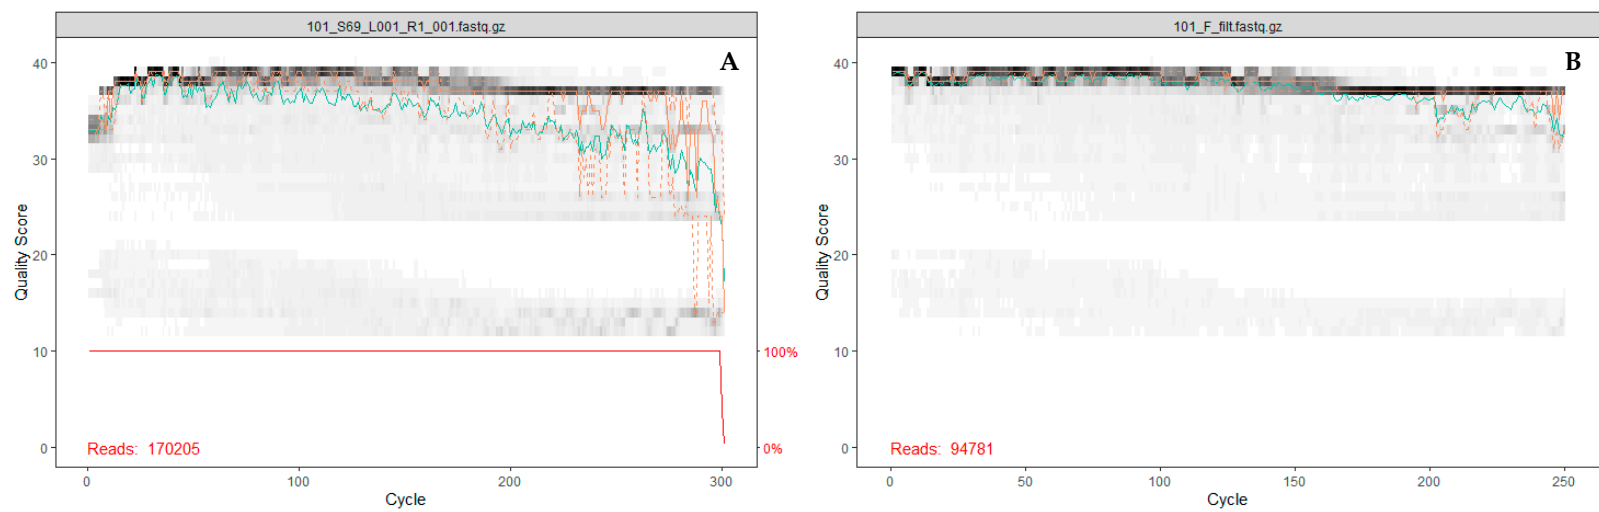

**Figure S1.** Sequencing quality check before (A) and after (B) cleaning and filterin
